# Supplementary material for: Efficacy of inhaled ciprofloxacin agents for the treatment of bronchiectasis: a systematic review and meta-analysis of randomized controlled trials
Source: PubMed Central journal article supplement — Ther Adv Respir Dis. 2019 Sep 20;13:1753466619875930. doi: 10.1177/1753466619875930 (PMC6755641; doi:10.1177/1753466619875930), 2019-09-20
Supplement: Author_response_to_reviewer_comments_v.3.pdf [file Author_response_to_reviewer_comments_v.3.pdf]

### Author response to reviewer comments v.3

We would like to thank you and the reviewers of the Therapeutic Advances in Respiratory Disease for taking the time to review our article. We made additional corrections and clarifications in the manuscript after going over the reviewer's comments. All authors have read and approved the revised manuscript. The changes are summarized below.

#### Reviewer 1' comments

1. The authors have accepted the change from NCFB to bronchiectasis except for the abstract and the title. I think they should change these as well. Furthermore, the name in the current title is "non-cystic fibrotic bronchiectasis" which should at least be amended to fibrosis rather than fibrotic.

R: Thank you for your previous comment. According to the reviewer's comment, we changed "NCFB" to "bronchiectasis" in the Title and the Abstract. We think this change made the manuscript more consistent.

We hope the revised manuscript will better meet the requirements of your journal for publication. We would like to thank the editor and the reviewers of the Therapeutic Advances in Respiratory Disease once again for their constructive review of our paper.
