# Supplementary material for: Efficacy of inhaled ciprofloxacin agents for the treatment of bronchiectasis: a systematic review and meta-analysis of randomized controlled trials
Source: PubMed Central journal article supplement — Ther Adv Respir Dis. 2019 Sep 20;13:1753466619875930. doi: 10.1177/1753466619875930 (PMC6755641; doi:10.1177/1753466619875930), 2019-09-20
Supplement: Full_electronic_search_strategy.pdf [file Full_electronic_search_strategy.pdf]

## **Full electronic search strategy**

### **PubMed ([www.ncbi.nlm.nih.gov/pubmed/](http://www.ncbi.nlm.nih.gov/pubmed/))**

# ("bronchiectasis"[MeSH Terms] OR "bronchiectasis"[All Fields]) AND ("ciprofloxacin"[MeSH Terms] OR "ciprofloxacin"[All Fields])

# Filter: publication date to January 31, 2019

### **EMBASE ([www.embase.com](http://www.embase.com))**

# bronchiectasis AND ciprofloxacin

# Filter 1: Title or Abstract

# Filter 2: publication date to January 31, 2019

### **Cochrane Library ([www.cochranelibrary.com](http://www.cochranelibrary.com)),**

# bronchiectasis AND ciprofloxacin

# Filter 1: Title Abstract Keyword

# Filter 2: publication date to January 31, 2019
