# Supplementary material for: Efficacy of inhaled ciprofloxacin agents for the treatment of bronchiectasis: a systematic review and meta-analysis of randomized controlled trials
Source: PubMed Central journal article supplement — Ther Adv Respir Dis. 2019 Sep 20;13:1753466619875930. doi: 10.1177/1753466619875930 (PMC6755641; doi:10.1177/1753466619875930), 2019-09-20
Supplement: Reviewer_1_v.2.pdf [file Reviewer_1_v.2.pdf]

Reviewer 1 v.2

Comments to the Author

On table 6 it is stated that studies ranged from 8 to 48 weeks, but the study by Wilson et al only provided 4 weeks of treatment. Please review if this statement is correct.

I agree with reviewer 2 that the term bronchiectasis is the ICD-10 code for this disease, and the accepted label by both the European Respiratory Society and other learned societies worldwide. The rationale to use NCFB to distinguish the disease from CF is outlined by the authors but is unnecessary. One sentence at the beginning of the introduction could resolve this. E.g Non-Cf bronchiectasis (henceforth referred to as bronchiectasis) is.. Whether to allow the authors to use this obsolete term is a matter for the editors but I would ask the authors to change it.

The authors state that they have converted 97.5 and 99% CI's from RESPIRE 1 and 2 to 95% Cis- this should be in the methods section including how it was done.
