# Supplementary material for: Efficacy of inhaled ciprofloxacin agents for the treatment of bronchiectasis: a systematic review and meta-analysis of randomized controlled trials
Source: PubMed Central journal article supplement — Ther Adv Respir Dis. 2019 Sep 20;13:1753466619875930. doi: 10.1177/1753466619875930 (PMC6755641; doi:10.1177/1753466619875930), 2019-09-20
Supplement: Reviewer_1_v.3.pdf [file Reviewer_1_v.3.pdf]

Reviewer 1 v.3

Comments to the Author

The authors have accepted the change from NCFB to bronchiectasis except for the abstract and the title. I think they should change these as well. Furthermore, the name in the current title is "non-cystic fibrotic bronchiectasis" which should at least be amended to fibrosis rather than fibrotic
