# Supplementary material for: Efficacy of inhaled ciprofloxacin agents for the treatment of bronchiectasis: a systematic review and meta-analysis of randomized controlled trials
Source: PubMed Central journal article supplement — Ther Adv Respir Dis. 2019 Sep 20;13:1753466619875930. doi: 10.1177/1753466619875930 (PMC6755641; doi:10.1177/1753466619875930), 2019-09-20
Supplement: SUPPLEMENTARY_MATRIALS_rev_2nd.pdf [file SUPPLEMENTARY_MATRIALS_rev_2nd.pdf]

## SUPPLEMENTARY MATERIALS

**Supplementary Table 1. Definition of pulmonary exacerbation and secondary end points of included studies**

| Author, year                                                                               | Study design, phase, name       | Definition of pulmonary exacerbation                                                                                                                                                                                                                                                    | Secondary endpoints                                                                                                                                                                         |
|--------------------------------------------------------------------------------------------|---------------------------------|-----------------------------------------------------------------------------------------------------------------------------------------------------------------------------------------------------------------------------------------------------------------------------------------|---------------------------------------------------------------------------------------------------------------------------------------------------------------------------------------------|
| Wilson <i>et al.</i> (2013) <sup>13</sup>                                                  | RCT, Phase II, n/a              | Not clearly defined. (The cited reference describes four definitions. <sup>27</sup> )                                                                                                                                                                                                   | Time to first exacerbation<br>Pathogen eradication and emergence of resistance<br>Sputum volume/color<br>Pulmonary function<br>Quality of life (SGRQ)<br>AEs                                |
| De Soyza <i>et al.</i> (2018) <sup>14</sup> and Aksamit <i>et al.</i> (2018) <sup>15</sup> | RCT, Phase III, RESPIRE 1 and 2 | All of following three criteria<br>1) worsening of at least three signs or symptoms (dyspnea, wheezing, cough, 24-h sputum volume or sputum purulence) for at least 2 consecutive days<br>2) fever (body temperature >38.0°C) or malaise/fatigue<br>3) systemic antibiotic treatment    | Exacerbations with a less stringent definition<br>Pathogen eradication and emergence of resistance<br>Pulmonary function<br>Quality of life (SGRQ and QOL-B RSS)<br>AEs                     |
| Serisier <i>et al.</i> (2013) <sup>16</sup>                                                | RCT, Phase II, ORBIT 2          | Deterioration in at least four of the following criteria<br>1) sputum production, 2) dyspnea, 3) cough, 4) fever, 5) wheezing, 6) exercise tolerance (or fatigue/lethargy/malaise), 7) FEV1 or FVC fall of at least 10%, 8) new changes on chest radiograph, 9) changes in chest sounds | Time to first exacerbation<br>Pulmonary function<br>Quality of life (SGRQ)<br>AEs                                                                                                           |
| Haworth <i>et al.</i> (2019) <sup>17</sup>                                                 | RCT, Phase III, ORBIT 3 and 4   | Same as above                                                                                                                                                                                                                                                                           | Total number of exacerbations, moderate or severe exacerbations<br><i>P aeruginosa</i> density and ciprofloxacin susceptibility<br>Pulmonary function<br>Quality of life (QOL-B RSS)<br>AEs |

Abbreviations: RCT, randomized controlled trial; SGRQ, St George's Respiratory Questionnaire; QOL-B RSS, Quality of Life-Bronchiectasis respiratory symptoms domain score; FEV1, forced expiratory volume in 1 second; FVC, forced vital capacity; AE, adverse event

**Supplementary Table 2. Definition of emergence of resistance according to each included study**

| <b>Author, year</b>                                                                                                                      | <b>Definition of emergence of resistance</b>                                                                                                                             |
|------------------------------------------------------------------------------------------------------------------------------------------|--------------------------------------------------------------------------------------------------------------------------------------------------------------------------|
| Wilson <i>et al.</i> (2013) <sup>13</sup> , De Soyza <i>et al.</i> (2018) <sup>14</sup> , and Aksamit <i>et al.</i> (2018) <sup>15</sup> | Increases in MIC to > 4 mg/L (a level defined as resistant to systemic therapy with ciprofloxacin, according to the CLSI guideline <sup>28</sup> )                       |
| Serisier <i>et al.</i> (2013) <sup>16</sup>                                                                                              | Increases in MIC to $\geq$ 2 mg/L (a level defined as intermediately susceptible to systemic therapy with ciprofloxacin, according to the CLSI guideline <sup>28</sup> ) |
| Haworth <i>et al.</i> (2019) <sup>17</sup>                                                                                               | MIC increase more than twofold                                                                                                                                           |

Abbreviations: MIC, minimum inhibitory concentration; CLSI, Clinical and Laboratory Standards Institute

**Supplementary Table 3. Microbiologic inclusion criteria of each included study**

| <b>Author, year</b>                                                                           | <b>Microbiologic inclusion criteria</b>                                                                                                                                                                                                                                                                                     |
|-----------------------------------------------------------------------------------------------|-----------------------------------------------------------------------------------------------------------------------------------------------------------------------------------------------------------------------------------------------------------------------------------------------------------------------------|
| Wilson <i>et al.</i> (2013) <sup>13</sup>                                                     | Isolation of a Pre-defined potential respiratory pathogen: <i>Pseudomonas aeruginosa</i> , <i>Staphylococcus aureus</i> , <i>Streptococcus pneumoniae</i> , <i>Haemophilus influenzae</i> , <i>Moraxella catarrhalis</i> , Enterobacteriaceae, <i>Stenotrophomonas maltophilia</i> , or <i>Achromobacter xylosoxidans</i> . |
| De Soyza <i>et al.</i> (2018) <sup>14</sup><br>and Aksamit <i>et al.</i> (2018) <sup>15</sup> | Isolation of a pre-specified pathogen: <i>P. aeruginosa</i> , <i>H. influenzae</i> , <i>M. catarrhalis</i> , <i>S. aureus</i> , <i>S. pneumoniae</i> , <i>S. maltophilia</i> , or <i>Burkholderia cepacia</i> .                                                                                                             |
| Serisier <i>et al.</i> (2013) <sup>16</sup>                                                   | Isolation of a ciprofloxacin-sensitive <i>P. aeruginosa</i> strain.                                                                                                                                                                                                                                                         |
| Haworth <i>et al.</i> (2019) <sup>17</sup>                                                    | Isolation of a ciprofloxacin non-resistant <i>P. aeruginosa</i> strain.                                                                                                                                                                                                                                                     |

(a)

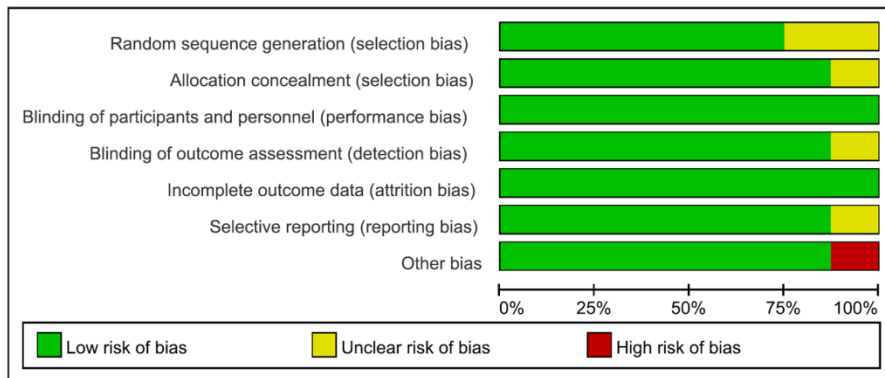

(b)

|                                                     | Random sequence generation (selection bias) | Allocation concealment (selection bias) | Blinding of participants and personnel (performance bias) | Blinding of outcome assessment (detection bias) | Incomplete outcome data (attrition bias) | Selective reporting (reporting bias) | Other bias |
|-----------------------------------------------------|---------------------------------------------|-----------------------------------------|-----------------------------------------------------------|-------------------------------------------------|------------------------------------------|--------------------------------------|------------|
| Aksamit et al. (2017) <sup>15</sup> -14 day on/off  | +                                           | +                                       | +                                                         | +                                               | +                                        | +                                    | +          |
| Aksamit et al. (2017) <sup>15</sup> -28 day on/off  | +                                           | +                                       | +                                                         | +                                               | +                                        | +                                    | +          |
| De Soyza et al. (2017) <sup>14</sup> -14 day on/off | +                                           | +                                       | +                                                         | +                                               | +                                        | +                                    | +          |
| De Soyza et al. (2017) <sup>14</sup> -28 day on/off | +                                           | +                                       | +                                                         | +                                               | +                                        | +                                    | +          |
| Haworth et al. (2019) <sup>17</sup> -ORBIT 3        | +                                           | +                                       | +                                                         | +                                               | +                                        | +                                    | +          |
| Haworth et al. (2019) <sup>17</sup> -ORBIT 4        | +                                           | +                                       | +                                                         | +                                               | +                                        | +                                    | +          |
| Serisier et al. (2013) <sup>16</sup>                | ?                                           | +                                       | +                                                         | ?                                               | +                                        | ?                                    | -          |
| Wilson et al. (2013) <sup>13</sup>                  | ?                                           | ?                                       | +                                                         | +                                               | +                                        | +                                    | +          |

Supplementary Figure 1. Risk of bias according to the Cochrane Collaboration's tool

(a) Summary of overall risk of bias. (b) Risk of bias of individual studies.

(a)

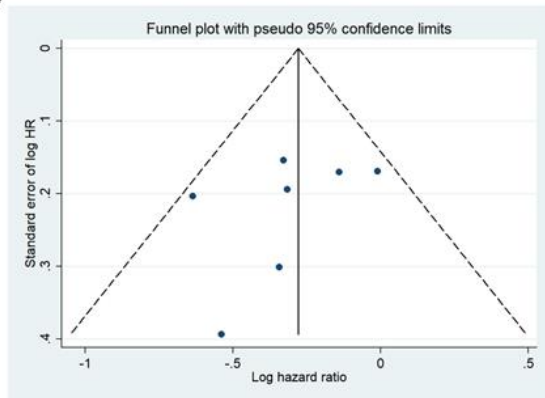

Egger test,  $P = 0.362$

(b)

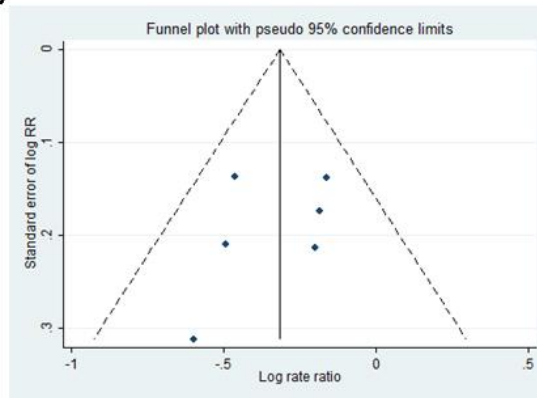

Egger test,  $P = 0.545$

(c)

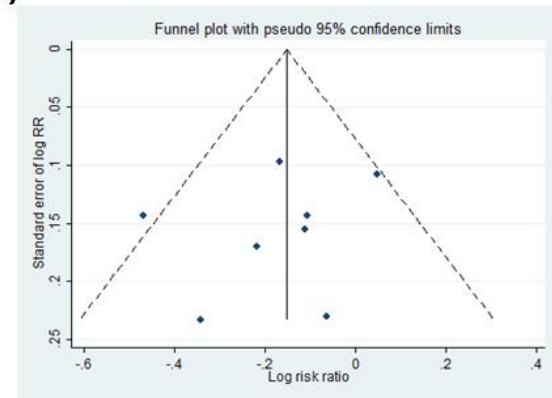

Egger test,  $P = 0.464$

**Supplementary Figure 2.** Funnel plots for the primary outcomes and results of Egger test.

(a) Time to first exacerbation. (b) Frequency of exacerbations. (c) Exacerbation proportion

Although publication bias was suspected by the funnel plots, it was not significant by Egger's test.

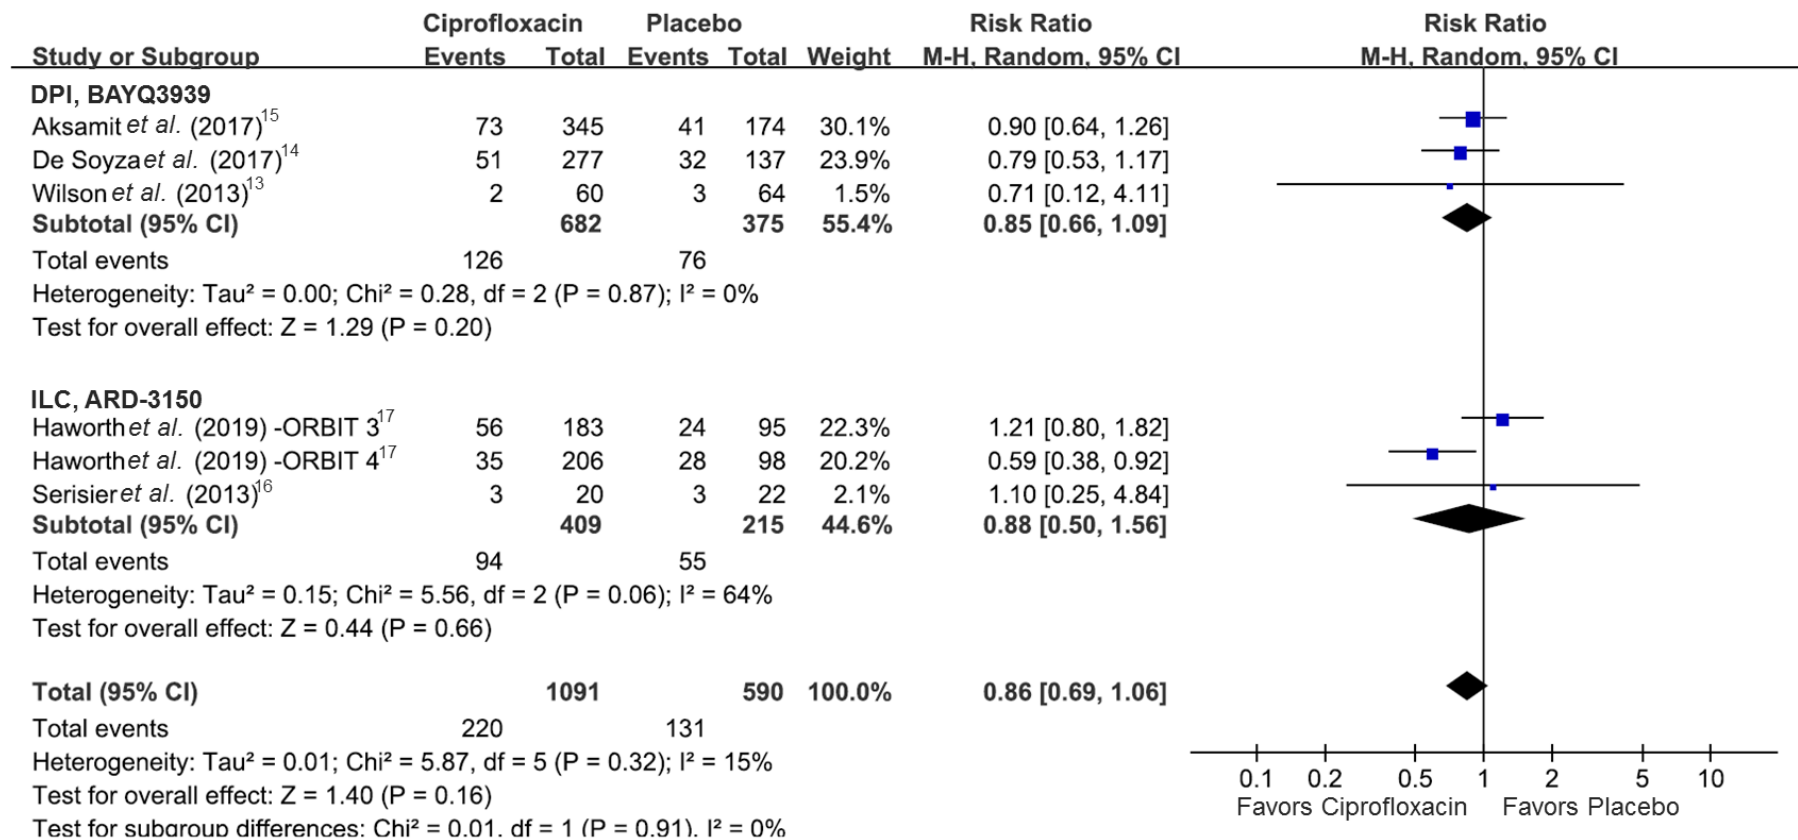

**Supplementary Figure 3.** Forest plot presenting the RRs of serious TE-AE among bronchiectasis patients treated with inhaled ciprofloxacin versus placebo.
